# Supplementary material for: Association of ultra-processed food intake with risk of inflammatory bowel disease: prospective cohort study
Source: PubMed Central journal article supplement — BMJ. 2021 Jul 15;374:n1554. doi: 10.1136/bmj.n1554 (PMC8279036; doi:10.1136/bmj.n1554), 2021-07-15

Supplementary Appendix 1 - PURE Study Participant Selection Methodology as Excerpted from Teo et al (26).

### **Selection of Countries**

The choice and number of countries selected in PURE reflects a balance between involving a large number of communities in countries at different economic levels, with substantial heterogeneity in social and economic circumstances and policies, and the feasibility of centers to successfully achieve long-term follow-up. Thus, PURE included sites in which investigators are committed to collecting good-quality data for a low-budget study over the planned 10-year follow-up period and did not aim for a strict proportionate sampling of the entire world.

### **Selection of Communities**

Within each country, urban and rural communities were selected based on broad guidelines. A common definition for “community” that is applicable globally is difficult to establish. In PURE, a community was defined as a group of people who have common characteristics and reside in a defined geographic area. A city or large town was not usually considered to be a single community, rather communities from low-, middle-, and high-income areas were selected from sections of the city and the community area defined according to a geographical measure (e.g., a set of contiguous postal code areas or a group of streets or a village). The primary sampling unit for rural areas in many countries was the village. The reason for inclusion of both urban and rural communities is that for many countries, urban and rural environments exhibit distinct characteristics in social and physical environment, and hence, by sampling both, we ensured considerable variation in societal factors across PURE communities. The number of communities selected in each country varied, with the aim to recruit communities with substantial heterogeneity in social and economic circumstances balanced against the capacity of local investigators to maintain follow-up. In some countries (e.g., India, China, Canada, and Colombia), communities from several states/provinces were included to capture regional diversity, in policy, socioeconomic status, culture, and physical environment. In other countries (e.g., Iran, Poland, Sweden, and Zimbabwe), fewer communities were selected.

### **Selections of Households and Individuals**

Within each community, sampling was designed to achieve a broadly representative sample of that community of adults aged between 35 and 70 years. The choice of sampling frame within each center was based on both “representativeness” and feasibility of long-term follow-up, following broad study guidelines. Once a community was identified, where possible, common and standardized approaches were applied to the enumeration of households, identification of individuals, recruitment procedures, and data collection. The method of approaching households differed between regions. For example, in rural areas of India and China, a community announcement was made to the village through contact of a community leader, followed by in-person door-to-door visits of all households. In contrast in Canada, initial contact was by mail followed by telephone inviting members of the households to a central clinic. Households were eligible if at least 1 member of the household was between the ages of 35 and 70 years and the household members intended to continue living in their current home for a further 4 years. For each approach, at least 3 attempts at contact were made. All individuals within these households between 35 and 70 years providing written informed consent were enrolled. When an eligible household or eligible individual in a household refused to participate, demographics and self-reported data about CVD risk factors, education, and history of CVD, cancers and deaths in the households within the two previous years were recorded. To ensure standardization and high data quality, we used a comprehensive operations manual, training workshops, DVDs, regular communication with study personnel and standardized report forms. We entered all data in a customized database programmed with range and consistency

checks which was transmitted electronically to the Population Health Research Institute in Hamilton (Ontario, Canada) where further quality checks were implemented.

#### Supplementary Appendix 2 – Validation exercise for 20% of IBD participants

Of 467 cases of IBD, we aimed to validate 20% of cases (93 participants). Medical records for these 93 participants (where available in English) were requested from participating centres selected at random, upon which centres were able to provide medical records (such as consultation, imaging, and endoscopy reports) for 88 participants. Manual review of these records was able to confirm these 83 cases included 26 diagnoses of Crohn’s disease and 57 diagnoses of ulcerative colitis. 83/93 (89.2%) cases could be verified. For the 5 cases that records were not provided, this was due to lack of access to medical records at that site.

#### Supplementary Table 1 – PURE food frequency questionnaire validation studies

| Country      | Validated | Reference dietary method | Reference                                                                                                                                                                                                 |
|--------------|-----------|--------------------------|-----------------------------------------------------------------------------------------------------------------------------------------------------------------------------------------------------------|
| Argentina    | Yes       | Multiple dietary recalls | Dehghan et al. PLoS One. 2012;7(5):e37958                                                                                                                                                                 |
| Brazil       | Yes       | Multiple dietary recalls | Under preparation                                                                                                                                                                                         |
| Canada       | Yes       | Multiple dietary recalls | Kelemen L et al. J Am Diet Assoc. 2003 103(9):1178-84                                                                                                                                                     |
| Chile        | Yes       | Multiple dietary recalls | Dehghan et al. Public Health Nutr. 2013;16 (10):1782-8.                                                                                                                                                   |
| China        | Yes       | Multiple dietary recalls | Zhao WH et al. Biomedical and environmental sciences. 2010; 23(suppl.), 1-38.                                                                                                                             |
| Colombia     | Yes       | Multiple dietary recalls | Dehghan et al. J Nutr Educ Behav. 2012;44(6):609-13.                                                                                                                                                      |
| Iran         | Yes       | Multiple dietary recalls | Under preparation                                                                                                                                                                                         |
| India        | Yes       | Multiple dietary recalls | Iqbal R et al. Public Health Nutr. 2009; 12(1):12-18<br><br>Bharati A et al. Asia Pac J Clin Nutr 2008; 14(1):178-185.<br><br>Mahajan R et al. The National Medical Journal of India vol. 26, no. 5, 2013 |
| Malaysia     | Yes       | Multiple dietary recalls | Book chapter                                                                                                                                                                                              |
| Palestine    | Yes       | Multiple dietary recalls | Under preparation                                                                                                                                                                                         |
| Poland       | Yes       | Multiple dietary recalls | Dehghan et al. J Hum Nutr Diet. 2012; 25(3):225-32                                                                                                                                                        |
| Sweden       | Yes       |                          | Khani B et al. J Nutr. 2004, 134:1541-1545                                                                                                                                                                |
| South Africa | Yes       | Multiple dietary recalls | MacIntyre UE et al. Public health nutr. 2000; 4(1), 63-71                                                                                                                                                 |
| Turkey       | Yes       | Multiple dietary recalls | Gunes eat al. J Pak Med Assoc. 2015; 65(7):756-63.                                                                                                                                                        |
| UAE          | Yes       | Multiple dietary recalls | Dehghan et al. Nutr J. 2005;4:18                                                                                                                                                                          |
| Kuwait/UAE   | Yes       | Multiple dietary recalls | Dehghan et al. Saudi Med J 2009; Vol30(1)                                                                                                                                                                 |
| Zimbabwe     | No        | FFQ development          | Development of FFQ Merchant et al. Nutr J. 2005;4:37                                                                                                                                                      |

Supplementary Table 2 - Association Between Total Ultra-processed Food Intake (grams/day) and Development of IBD

| IBD                               |               |                     |                     |         |
|-----------------------------------|---------------|---------------------|---------------------|---------|
|                                   | <50g/day      | 50 to <100g/day     | ≥100g/day           | P trend |
| <b>No. of participants</b>        | 77,318        | 12,820              | 24,928              |         |
| <b>No. of events (%)</b>          | 218 (0.28)    | 66 (0.51)           | 180 (0.72)          |         |
| <b>Unadjusted HR (95% CI)</b>     | 1 (reference) | 1.99 (1.51 to 2.62) | 2.75 (2.25 to 3.35) | <0.001  |
| <b>Min. adjusted HR (95% CI)</b>  | 1 (reference) | 1.42 (1.07 to 1.90) | 1.59 (1.26 to 2.01) | 0.004   |
| <b>Fully adjusted HR (95% CI)</b> | 1 (reference) | 1.33 (0.88 to 2.01) | 1.73 (1.23 to 2.45) | 0.007   |
| Crohn's disease                   |               |                     |                     |         |
| <b>No. of participants</b>        | 77,318        | 12,820              | 24,928              |         |
| <b>No. of events (%)</b>          | 34 (0.04)     | 12 (0.09)           | 41 (0.16)           |         |
| <b>Unadjusted HR (95% CI)</b>     | 1 (reference) | 2.31 (1.20 to 4.47) | 4.00 (2.54 to 6.30) | <0.001  |
| <b>Min. adjusted HR (95% CI)</b>  | 1 (reference) | 1.22 (0.61 to 2.45) | 1.50 (0.87 to 2.59) | 0.34    |
| <b>Fully adjusted HR (95% CI)</b> | 1 (reference) | 2.42 (0.91 to 6.42) | 2.83 (1.17 to 6.83) | 0.07    |
| Ulcerative colitis                |               |                     |                     |         |
| <b>No. of participants</b>        | 77,318        | 12,820              | 24,928              |         |
| <b>No. of events (%)</b>          | 184 (0.24)    | 54 (0.42)           | 139 (0.56)          |         |
| <b>Unadjusted HR (95% CI)</b>     | 1 (reference) | 1.93 (1.43 to 2.62) | 2.51 (2.02 to 3.13) | <0.001  |
| <b>Min. adjusted HR (95% CI)</b>  | 1 (reference) | 1.47 (1.07-2.02)    | 1.60 (1.24 to 2.08) | 0.001   |
| <b>Fully adjusted HR (95% CI)</b> | 1 (reference) | 1.16 (0.73 to 1.87) | 1.57 (1.07 to 2.30) | 0.05    |

Heterogeneity of results from Crohn's disease and ulcerative colitis - Chi<sup>2</sup> p-value=0.595; I<sup>2</sup> = 0%.

Minimal adjustments are for age, gender, and geographic region. Fully adjusted model includes age, gender, geographic region, education, alcohol intake, smoking status, BMI, total energy intake and location.

Supplementary Table 3 – Association Between Total Ultra-processed Food Intake (servings/day) and Development of IBD in Participants < Age 50

| IBD                               |                |                      |                     |         |
|-----------------------------------|----------------|----------------------|---------------------|---------|
|                                   | <1 serving/day | 1 to <5 servings/day | ≥ 5 servings/day    | P trend |
| <b>No. of participants</b>        | 38,034         | 11,964               | 5,108               |         |
| <b>No. of events (%)</b>          | 110 (0.29)     | 49 (0.41)            | 34 (0.67)           |         |
| <b>Unadjusted HR (95% CI)</b>     | 1 (reference)  | 1.54 (1.10 to 2.16)  | 2.36 (1.61 to 3.47) | <0.001  |
| <b>Min. adjusted HR (95% CI)</b>  | 1 (reference)  | 1.26 (0.89 to 1.80)  | 1.47 (0.95 to 2.29) | 0.18    |
| <b>Fully adjusted HR (95% CI)</b> | 1 (reference)  | 1.27 (0.68 to 2.37)  | 2.02 (1.03 to 3.97) | 0.10    |

Supplementary Table 4 - Association Between Total Ultra-processed Food Intake (servings/day) and Development of IBD in Participants  $\geq$  Age 50

| IBD                               |                |                      |                       |         |
|-----------------------------------|----------------|----------------------|-----------------------|---------|
|                                   | <1 serving/day | 1 to <5 servings/day | $\geq$ 5 servings/day | P trend |
| <b>No. of participants</b>        | 38,381         | 13,489               | 6,634                 |         |
| <b>No. of events (%)</b>          | 89 (0.23)      | 85 (0.63)            | 61 (0.92)             |         |
| <b>Unadjusted HR (95% CI)</b>     | 1 (reference)  | 2.94 (2.19 to 3.96)  | 4.06 (2.93 to 5.62)   | <0.001  |
| <b>Min. adjusted HR (95% CI)</b>  | 1 (reference)  | 1.48 (1.06 to 2.08)  | 1.39 (0.94 to 2.06)   | 0.07    |
| <b>Fully adjusted HR (95% CI)</b> | 1 (reference)  | 1.90 (1.24 to 2.94)  | 1.76 (1.06 to 2.91)   | 0.01    |

Supplementary Table 5 - Association Between Total Processed Meat Intake (servings/day) and Development of IBD

| IBD                               |                 |                                  |                        |         |
|-----------------------------------|-----------------|----------------------------------|------------------------|---------|
|                                   | <1 serving/week | 1 serving/week to <1 serving/day | $\geq$ 1 serving/day   | P trend |
| <b>No. of participants</b>        | 33,827          | 50,274                           | 3,045                  |         |
| <b>No. of events (%)</b>          | 43 (0.13)       | 263 (0.52)                       | 24 (0.79)              |         |
| <b>Unadjusted HR (95% CI)</b>     | 1 (reference)   | 4.20 (3.05 to 5.80)              | 6.30 (3.82 to 10.38)   | <0.001  |
| <b>Min. adjusted HR (95% CI)</b>  | 1 (reference)   | 2.39 (1.69 to 3.37)              | 2.36 (1.39 to 4.01)    | <0.001  |
| <b>Fully adjusted HR (95% CI)</b> | 1 (reference)   | 1.92 (1.24 to 2.98)              | 2.07 (1.14 to 3.76)    | 0.01    |
| Crohn's disease                   |                 |                                  |                        |         |
| <b>No. of participants</b>        | 33,827          | 50,274                           | 3,045                  |         |
| <b>No. of events (%)</b>          | 2 (0.01)        | 56 (0.11)                        | 4 (0.13)               |         |
| <b>Unadjusted HR (95% CI)</b>     | 1 (reference)   | 19.23 (4.69 to 78.79)            | 22.67 (4.15 to 123.75) |         |
| <b>Min. adjusted HR (95% CI)</b>  | 1 (reference)   | 6.13 (1.43 to 26.36)             | 3.80 (0.66 to 22.04)   |         |
| <b>Fully adjusted HR (95% CI)</b> | 1 (reference)   | 3.99 (0.83 to 19.22)             | 2.50 (0.39 to 16.03)   |         |
| Ulcerative colitis                |                 |                                  |                        |         |
| <b>No. of participants</b>        | 33,827          | 50,274                           | 3,045                  |         |
| <b>No. of events (%)</b>          | 41 (0.12)       | 207 (0.41)                       | 20 (0.66)              |         |
| <b>Unadjusted HR (95% CI)</b>     | 1 (reference)   | 3.47 (2.48 to 4.85)              | 5.50 (3.22 to 9.39)    |         |
| <b>Min. adjusted HR (95% CI)</b>  | 1 (reference)   | 2.19 (1.53 to 3.13)              | 2.43 (1.38 to 4.29)    |         |
| <b>Fully adjusted HR (95% CI)</b> | 1 (reference)   | 1.77 (1.11 to 2.80)              | 2.19 (1.16 to 4.16)    |         |

Heterogeneity of results from Crohn's disease and ulcerative colitis -  $\text{Chi}^2$  p-value=0.929;  $I^2 = 0\%$ .

Minimal adjustments are for age, gender, and geographic region. Fully adjusted model includes age, gender, geographic region, education, alcohol intake, smoking status, BMI, total energy intake and location.

Supplementary Table 6- Association Between Total Soft Drink Intake (servings/day) and Development of IBD

| IBD                               |                      |                            |                     |         |
|-----------------------------------|----------------------|----------------------------|---------------------|---------|
|                                   | <0.5<br>serving/week | 0.5 to <3<br>servings/week | ≥3 servings/week    | P trend |
| <b>No. of participants</b>        | 83,067               | 17,814                     | 12,106              |         |
| <b>No. of events (%)</b>          | 261 (0.31)           | 95 (0.53)                  | 66 (0.55)           |         |
| <b>Unadjusted HR (95% CI)</b>     | 1 (reference)        | 1.80 (1.42 to 2.27)        | 1.91 (1.46 to 2.51) | <0.001  |
| <b>Min. adjusted HR (95% CI)</b>  | 1 (reference)        | 1.28 (1.00 to 1.63)        | 1.30 (0.99 to 1.72) | 0.05    |
| <b>Fully adjusted HR (95% CI)</b> | 1 (reference)        | 1.50 (1.10 to 2.03)        | 1.94 (1.42 to 2.66) | 0.001   |
| Crohn's disease                   |                      |                            |                     |         |
| <b>No. of participants</b>        | 83,067               | 17,814                     | 12,106              |         |
| <b>No. of events (%)</b>          | 49 (0.06)            | 24 (0.13)                  | 17 (0.14)           |         |
| <b>Unadjusted HR (95% CI)</b>     | 1 (reference)        | 2.41 (1.48 to 3.93)        | 2.62 (1.51 to 4.54) |         |
| <b>Min. adjusted HR (95% CI)</b>  | 1 (reference)        | 1.51 (0.91 to 2.49)        | 1.54 (0.87 to 2.72) |         |
| <b>Fully adjusted HR (95% CI)</b> | 1 (reference)        | 2.07 (1.12 to 3.83)        | 2.36 (1.23 to 4.55) |         |
| Ulcerative colitis                |                      |                            |                     |         |
| <b>No. of participants</b>        | 83,067               | 17,814                     | 12,106              |         |
| <b>No. of events (%)</b>          | 212 (0.26)           | 71 (0.40)                  | 49 (0.40)           |         |
| <b>Unadjusted HR (95% CI)</b>     | 1 (reference)        | 1.66 (1.26 to 2.17)        | 1.75 (1.28 to 2.39) |         |
| <b>Min. adjusted HR (95% CI)</b>  | 1 (reference)        | 1.22 (0.92 to 1.61)        | 1.24 (0.90 to 1.71) |         |
| <b>Fully adjusted HR (95% CI)</b> | 1 (reference)        | 1.35 (0.95 to 1.93)        | 1.84 (1.29 to 2.64) |         |

Heterogeneity of results from Crohn's disease and ulcerative colitis - Chi<sup>2</sup> p-value=0.722; I<sup>2</sup> = 0%.

Minimal adjustments are for age, gender, and geographic region. Fully adjusted model includes age, gender, geographic region, education, alcohol intake, smoking status, BMI, total energy intake and location.

Supplementary Table 7- Association Between Sweets Intake (grams/day) and Development of IBD

| IBD                               |               |                     |                     |         |
|-----------------------------------|---------------|---------------------|---------------------|---------|
|                                   | 0 g/day       | <100g/day           | ≥100g/day           | P trend |
| <b>No. of participants</b>        | 20,812        | 68,360              | 23,109              |         |
| <b>No. of events (%)</b>          | 60 (0.29)     | 283 (0.41)          | 123 (0.53)          |         |
| <b>Unadjusted HR (95% CI)</b>     | 1 (reference) | 1.43 (1.08 to 1.89) | 1.91 (1.40 to 2.60) | 0.002   |
| <b>Min. adjusted HR (95% CI)</b>  | 1 (reference) | 1.00 (0.75 to 1.34) | 1.22 (0.88 to 1.68) | 0.18    |
| <b>Fully adjusted HR (95% CI)</b> | 1 (reference) | 1.86 (1.08 to 3.23) | 2.58 (1.44 to 4.62) | 0.003   |
| Crohn's disease                   |               |                     |                     |         |
| <b>No. of participants</b>        | 20,812        | 68,360              | 23,109              |         |
| <b>No. of events (%)</b>          | 16 (0.08)     | 51 (0.07)           | 23 (0.10)           |         |
| <b>Unadjusted HR (95% CI)</b>     | 1 (reference) | 0.97 (0.55 to 1.70) | 1.34 (0.71 to 2.53) |         |
| <b>Min. adjusted HR (95% CI)</b>  | 1 (reference) | 0.47 (0.26 to 0.87) | 0.54 (0.27 to 1.08) |         |
| <b>Fully adjusted HR (95% CI)</b> | 1 (reference) | 0.74 (0.24 to 2.30) | 1.17 (0.35 to 3.84) |         |
| Ulcerative colitis                |               |                     |                     |         |
| <b>No. of participants</b>        | 20,812        | 68,360              | 23,109              |         |
| <b>No. of events (%)</b>          | 44 (0.21)     | 232 (0.34)          | 100 (0.43)          |         |
| <b>Unadjusted HR (95% CI)</b>     | 1 (reference) | 1.60 (1.16 to 2.20) | 2.11 (1.48 to 3.01) |         |
| <b>Min. adjusted HR (95% CI)</b>  | 1 (reference) | 1.20 (0.86 to 1.67) | 1.48 (1.02 to 2.13) |         |
| <b>Fully adjusted HR (95% CI)</b> | 1 (reference) | 2.31 (1.22 to 4.36) | 3.08 (1.57 to 6.05) |         |

Heterogeneity of results from Crohn's disease and ulcerative colitis - Chi<sup>2</sup> p-value=0.165; I<sup>2</sup> = 41%.

Minimal adjustments are for age, gender, and geographic region. Fully adjusted model includes age, gender, geographic region, education, alcohol intake, smoking status, BMI, total energy intake and location.

Supplementary Table 8- Association Between Salty Food and Snacks Intake (grams/day) and Development of IBD

| IBD                               |               |                     |                     |         |
|-----------------------------------|---------------|---------------------|---------------------|---------|
|                                   | <50g/day      | 50 to <100g/day     | ≥100g/day           | P trend |
| <b>No. of participants</b>        | 91,756        | 15,611              | 5,849               |         |
| <b>No. of events (%)</b>          | 320 (0.35)    | 85 (0.54)           | 59 (1.01)           |         |
| <b>Unadjusted HR (95% CI)</b>     | 1 (reference) | 1.63 (1.28 to 2.07) | 3.14 (2.38 to 4.15) | <0.001  |
| <b>Min. adjusted HR (95% CI)</b>  | 1 (reference) | 1.11 (0.87 to 1.43) | 1.73 (1.28 to 2.32) | 0.002   |
| <b>Fully adjusted HR (95% CI)</b> | 1 (reference) | 1.22 (0.89 to 1.66) | 2.06 (1.41 to 3.00) | 0.009   |
| Crohn's disease                   |               |                     |                     |         |
| <b>No. of participants</b>        | 91,756        | 15,611              | 5,849               |         |
| <b>No. of events (%)</b>          | 60 (0.07)     | 14 (0.09)           | 13 (0.22)           |         |
| <b>Unadjusted HR (95% CI)</b>     | 1 (reference) | 1.42 (0.80 to 2.55) | 3.70 (2.03 to 6.74) |         |
| <b>Min. adjusted HR (95% CI)</b>  | 1 (reference) | 0.72 (0.40 to 1.32) | 1.32 (0.70 to 2.49) |         |
| <b>Fully adjusted HR (95% CI)</b> | 1 (reference) | 0.97 (0.50 to 1.89) | 1.73 (0.80 to 3.73) |         |
| Ulcerative colitis                |               |                     |                     |         |
| <b>No. of participants</b>        | 91,756        | 15,611              | 5,849               |         |
| <b>No. of events (%)</b>          | 260 (0.28)    | 71 (0.45)           | 46 (0.79)           |         |
| <b>Unadjusted HR (95% CI)</b>     | 1 (reference) | 1.67 (1.29 to 2.18) | 3.02 (2.20 to 4.13) |         |
| <b>Min. adjusted HR (95% CI)</b>  | 1 (reference) | 1.23 (0.94 to 1.62) | 1.84 (1.32 to 2.58) |         |
| <b>Fully adjusted HR (95% CI)</b> | 1 (reference) | 1.30 (0.91 to 1.85) | 2.16 (1.40 to 3.33) |         |

Heterogeneity of results from Crohn's disease and ulcerative colitis - Chi<sup>2</sup> p-value=0.245; I<sup>2</sup> = 27.8%.

Minimal adjustments are for age, gender, and geographic region. Fully adjusted model includes age, gender, geographic region, education, alcohol intake, smoking status, BMI, total energy intake and location.

Supplementary Table 9 - Association of Urinary Sodium (grams/day) and Development of IBD (sensitivity analyses)

|                                   | <2.5g/day     | 2.5 to <3.5g/day    | 3.5 to <5g/day      | ≥5g/day             | P trend |
|-----------------------------------|---------------|---------------------|---------------------|---------------------|---------|
| <b>No. of participants</b>        | 8,014         | 9,262               | 17,618              | 12,485              |         |
| <b>No. of events (%)</b>          | 42 (0.52)     | 72 (0.78)           | 151 (0.86)          | 100 (0.80)          |         |
| <b>Unadjusted HR (95% CI)</b>     | 1 (reference) | 1.59 (1.09 to 2.32) | 1.73 (1.23 to 2.43) | 1.60 (1.11 to 2.29) | 0.02    |
| <b>Min. adjusted HR (95% CI)</b>  | 1 (reference) | 1.82 (1.24 to 2.67) | 2.06 (1.46 to 2.92) | 2.06 (1.42 to 2.99) | 0.004   |
| <b>Fully adjusted HR (95% CI)</b> | 1 (reference) | 1.18 (0.75 to 1.84) | 1.29 (0.86 to 1.93) | 0.99 (0.62 to 1.59) | 0.45    |
| <b>Excluding China:</b>           |               |                     |                     |                     |         |
|                                   | <2.5g/day     | 2.5 to <3.5g/day    | ≥3.5g/day           | P trend             |         |
| <b>No. of participants</b>        | 8,014         | 9,262               | 30,103              |                     |         |
| <b>No. of events (%)</b>          | 42 (0.52)     | 72 (0.78)           | 251 (0.83)          |                     |         |
| <b>Unadjusted HR (95% CI)</b>     | 1 (reference) | 1.59 (1.09 to 2.32) | 1.67 (1.21 to 2.32) | 0.009               |         |
| <b>Min. adjusted HR (95% CI)</b>  | 1 (reference) | 1.82 (1.24 to 2.67) | 2.06 (1.48 to 2.88) | <0.001              |         |
| <b>Fully adjusted HR (95% CI)</b> | 1 (reference) | 1.17 (0.75 to 1.82) | 1.19 (0.81 to 1.75) | 0.68                |         |

Minimal adjustments are for age, gender, and geographic region. Fully adjusted model includes age, gender, geographic region, education, alcohol intake, smoking status, BMI, total energy intake and location.

Supplementary Table 10 - Association of White Meat Intake and Development of IBD

|                                   | <1 serving/week | 1 to <3 servings/week | ≥3 servings/week    | P trend |
|-----------------------------------|-----------------|-----------------------|---------------------|---------|
| <b>No. of participants</b>        | 60,837          | 26,518                | 25,320              |         |
| <b>No. of events (%)</b>          | 191 (0.31)      | 152 (0.57)            | 87 (0.34)           |         |
| <b>Unadjusted HR (95% CI)</b>     | 1 (reference)   | 1.88 (1.52 to 2.32)   | 1.17 (0.91 to 1.51) | <0.001  |
| <b>Min. adjusted HR (95% CI)</b>  | 1 (reference)   | 1.16 (0.92 to 1.45)   | 1.06 (0.82 to 1.36) | 0.46    |
| <b>Fully adjusted HR (95% CI)</b> | 1 (reference)   | 1.31 (0.99 to 1.74)   | 1.38 (0.97 to 1.95) | 0.10    |

Minimal adjustments are for age, gender, and geographic region. Fully adjusted model includes age, gender, geographic region, education, alcohol intake, smoking status, BMI, total energy intake and location.



Supplementary Table 11 - Association of Red Meat (Unprocessed) Intake and Development of IBD

|                                   | <3 servings/week | 3 to <7 servings/week | ≥7 servings/week    | P trend |
|-----------------------------------|------------------|-----------------------|---------------------|---------|
| <b>No. of participants</b>        | 50,694           | 30,897                | 27,009              |         |
| <b>No. of events (%)</b>          | 179 (0.35)       | 115 (0.37)            | 133 (0.49)          |         |
| <b>Unadjusted HR (95% CI)</b>     | 1 (reference)    | 1.08 (0.85 to 1.36)   | 1.42 (1.14 to 1.78) | 0.007   |
| <b>Min. adjusted HR (95% CI)</b>  | 1 (reference)    | 0.83 (0.65 to 1.05)   | 1.03 (0.82 to 1.30) | 0.18    |
| <b>Fully adjusted HR (95% CI)</b> | 1 (reference)    | 1.00 (0.74 to 1.35)   | 1.12 (0.81 to 1.53) | 0.72    |

Minimal adjustments are for age, gender, and geographic region. Fully adjusted model includes age, gender, geographic region, education, alcohol intake, smoking status, BMI, total energy intake and location.

Supplementary Table 12 - Association of Dairy Intake and Development of IBD

|                                   | <1 serving/day | 1 to <2 servings/day | ≥2 servings/day     | P trend |
|-----------------------------------|----------------|----------------------|---------------------|---------|
| <b>No. of participants</b>        | 64,198         | 22,995               | 27,388              |         |
| <b>No. of events (%)</b>          | 153 (0.24)     | 73 (0.32)            | 205 (0.75)          |         |
| <b>Unadjusted HR (95% CI)</b>     | 1 (reference)  | 1.33 (1.01 to 1.76)  | 3.07 (2.49 to 3.79) | <0.001  |
| <b>Min. adjusted HR (95% CI)</b>  | 1 (reference)  | 1.06 (0.80 to 1.41)  | 1.50 (1.15 to 1.96) | 0.006   |
| <b>Fully adjusted HR (95% CI)</b> | 1 (reference)  | 1.14 (0.78 to 1.68)  | 1.26 (0.86 to 1.83) | 0.49    |

Minimal adjustments are for age, gender, and geographic region. Fully adjusted model includes age, gender, geographic region, education, alcohol intake, smoking status, BMI, total energy intake and location.

Supplementary Table 13 - Association of Starch Intake and Development of IBD

|                                   | <200g/day     | 200 to <400g/day    | ≥400g/day           | P trend |
|-----------------------------------|---------------|---------------------|---------------------|---------|
| <b>No. of participants</b>        | 9,770         | 42,878              | 63,389              |         |
| <b>No. of events (%)</b>          | 48 (0.49)     | 198 (0.46)          | 221 (0.35)          |         |
| <b>Unadjusted HR (95% CI)</b>     | 1 (reference) | 0.93 (0.68 to 1.27) | 0.70 (0.51 to 0.95) | 0.005   |
| <b>Min. adjusted HR (95% CI)</b>  | 1 (reference) | 1.22 (0.89 to 1.67) | 1.23 (0.89 to 1.71) | 0.43    |
| <b>Fully adjusted HR (95% CI)</b> | 1 (reference) | 1.41 (0.98 to 2.04) | 1.50 (0.95 to 2.38) | 0.16    |

Minimal adjustments are for age, gender, and geographic region. Fully adjusted model includes age, gender, geographic region, education, alcohol intake, smoking status, BMI, total energy intake and location.

Supplementary Table 14 - Association of Fruit, Vegetable & Legume Intake and Development of IBD

|                                   | <2 servings/day | 2 to <6 servings/day | ≥6 servings/day     | P trend |
|-----------------------------------|-----------------|----------------------|---------------------|---------|
| <b>No. of participants</b>        | 15,354          | 64,473               | 34,754              |         |
| <b>No. of events (%)</b>          | 40 (0.26)       | 194 (0.30)           | 197 (0.57)          |         |
| <b>Unadjusted HR (95% CI)</b>     | 1 (reference)   | 1.16 (0.83 to 1.63)  | 2.36 (1.68 to 3.32) | <0.001  |
| <b>Min. adjusted HR (95% CI)</b>  | 1 (reference)   | 1.02 (0.72 to 1.43)  | 1.23 (0.86 to 1.77) | 0.21    |
| <b>Fully adjusted HR (95% CI)</b> | 1 (reference)   | 0.97 (0.59 to 1.60)  | 1.31 (0.77 to 2.22) | 0.11    |

Minimal adjustments are for age, gender, and geographic region. Fully adjusted model includes age, gender, geographic region, education, alcohol intake, smoking status, BMI, total energy intake and location.

Supplementary Table 15 - Association of Fruit Intake and Development of IBD

|                                   | <1 serving/day | 1 to <4 servings/day | ≥4 servings/day     | P trend |
|-----------------------------------|----------------|----------------------|---------------------|---------|
| <b>No. of participants</b>        | 55,344         | 46,265               | 12,972              |         |
| <b>No. of events (%)</b>          | 152 (0.27)     | 225 (0.49)           | 54 (0.42)           |         |
| <b>Unadjusted HR (95% CI)</b>     | 1 (reference)  | 1.90 (1.54 to 2.33)  | 1.69 (1.24 to 2.30) | <0.001  |
| <b>Min. adjusted HR (95% CI)</b>  | 1 (reference)  | 1.21 (0.97 to 1.52)  | 0.91 (0.65 to 1.27) | 0.07    |
| <b>Fully adjusted HR (95% CI)</b> | 1 (reference)  | 1.06 (0.79 to 1.43)  | 0.79 (0.50 to 1.23) | 0.31    |

Minimal adjustments are for age, gender, and geographic region. Fully adjusted model includes age, gender, geographic region, education, alcohol intake, smoking status, BMI, total energy intake and location.

Supplementary Table 16 - Association of Vegetable Intake and Development of IBD

|                                   | <5 servings/day | 5 to <7 servings/day | ≥7 servings/day     | P trend |
|-----------------------------------|-----------------|----------------------|---------------------|---------|
| <b>No. of participants</b>        | 99,966          | 6,771                | 7,844               |         |
| <b>No. of events (%)</b>          | 313 (0.31)      | 40 (0.59)            | 78 (0.99)           |         |
| <b>Unadjusted HR (95% CI)</b>     | 1 (reference)   | 1.87 (1.35 to 2.60)  | 3.17 (2.47 to 4.06) | <0.001  |
| <b>Min. adjusted HR (95% CI)</b>  | 1 (reference)   | 1.21 (0.86 to 1.70)  | 1.33 (1.00 to 1.76) | 0.11    |
| <b>Fully adjusted HR (95% CI)</b> | 1 (reference)   | 1.43 (0.98 to 2.09)  | 1.38 (1.00 to 1.89) | 0.06    |

Minimal adjustments are for age, gender, and geographic region. Fully adjusted model includes age, gender, geographic region, education, alcohol intake, smoking status, BMI, total energy intake and location.

Supplementary Table 17 - Association of Legume Intake and Development of IBD

|                                   | <1 serving/week | 1 to <3 servings/week | ≥3 servings/week    | P trend |
|-----------------------------------|-----------------|-----------------------|---------------------|---------|
| <b>No. of participants</b>        | 25,015          | 33,463                | 54,197              |         |
| <b>No. of events (%)</b>          | 105 (0.42)      | 156 (0.47)            | 169 (0.31)          |         |
| <b>Unadjusted HR (95% CI)</b>     | 1 (reference)   | 1.11 (0.87 to 1.42)   | 0.73 (0.57 to 0.93) | <0.001  |
| <b>Min. adjusted HR (95% CI)</b>  | 1 (reference)   | 0.97 (0.75 to 1.24)   | 0.72 (0.57 to 0.92) | 0.008   |
| <b>Fully adjusted HR (95% CI)</b> | 1 (reference)   | 0.97 (0.69 to 1.36)   | 1.20 (0.87 to 1.66) | 0.25    |

Minimal adjustments are for age, gender, and geographic region. Fully adjusted model includes age, gender, geographic region, education, alcohol intake, smoking status, BMI, total energy intake and location.

Supplementary Table 18 - Association of Fried Foods Intake and Development of IBD

| IBD                               |               |                     |                     |         |
|-----------------------------------|---------------|---------------------|---------------------|---------|
|                                   | 0 servings    | <1 serving/day      | ≥1 serving/day      | P trend |
| <b>No. of participants</b>        | 18,290        | 56,606              | 39,685              |         |
| <b>No. of events (%)</b>          | 44 (0.24)     | 163 (0.29)          | 224 (0.56)          |         |
| <b>Unadjusted HR (95% CI)</b>     | 1 (reference) | 1.21 (0.86 to 1.68) | 2.50 (1.81 to 3.45) | <0.001  |
| <b>Min. adjusted HR (95% CI)</b>  | 1 (reference) | 1.00 (0.72 to 1.41) | 1.26 (0.88 to 1.79) | 0.12    |
| <b>Fully adjusted HR (95% CI)</b> | 1 (reference) | 2.35 (1.21 to 4.55) | 3.02 (1.51 to 6.03) | 0.006   |
| Crohn's disease                   |               |                     |                     |         |
| <b>No. of participants</b>        | 18,290        | 56,606              | 39,685              |         |
| <b>No. of events (%)</b>          | 12 (0.07)     | 28 (0.05)           | 50 (0.13)           |         |
| <b>Unadjusted HR (95% CI)</b>     | 1 (reference) | 0.76 (0.39 to 1.50) | 2.04 (1.09 to 3.83) |         |
| <b>Min. adjusted HR (95% CI)</b>  | 1 (reference) | 0.54 (0.27 to 1.08) | 0.65 (0.31 to 1.36) |         |
| <b>Fully adjusted HR (95% CI)</b> | 1 (reference) | 0.68 (0.18 to 2.56) | 1.19 (0.30 to 4.66) |         |
| Ulcerative colitis                |               |                     |                     |         |
| <b>No. of participants</b>        | 18,290        | 56,606              | 39,685              |         |
| <b>No. of events (%)</b>          | 32 (0.17)     | 135 (0.24)          | 174 (0.44)          |         |
| <b>Unadjusted HR (95% CI)</b>     | 1 (reference) | 1.37 (0.93 to 2.02) | 2.67 (1.83 to 3.89) |         |
| <b>Min. adjusted HR (95% CI)</b>  | 1 (reference) | 1.18 (0.80 to 1.74) | 1.49 (0.99 to 2.23) |         |
| <b>Fully adjusted HR (95% CI)</b> | 1 (reference) | 3.13 (1.43 to 6.82) | 3.76 (1.67 to 8.51) |         |

Heterogeneity of results from Crohn's disease and ulcerative colitis - Chi<sup>2</sup> p-value=0.186; I<sup>2</sup> = 37.6%.

Minimal adjustments are for age, gender, and geographic region. Fully adjusted model includes age, gender, geographic region, education, alcohol intake, smoking status, BMI, total energy intake and location.

Supplementary Figure 1 – Study flow diagram for participant selection

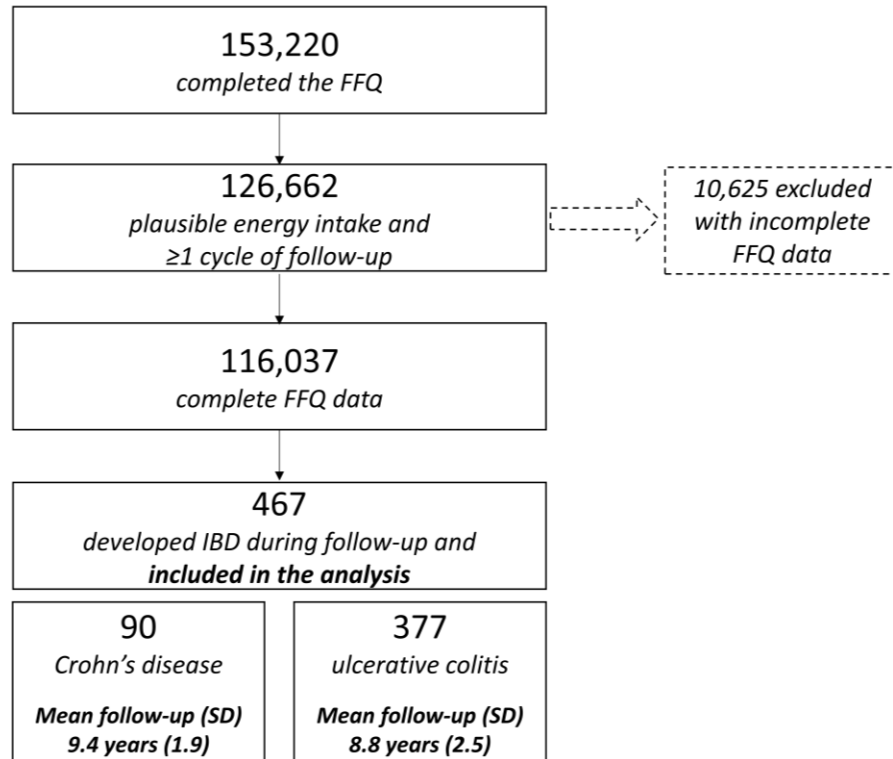

Supplementary Figure 2 – Forest plot of ultra-processed food intake by region comparing  $\geq 1$  serving per day with  $< 1$  serving per day

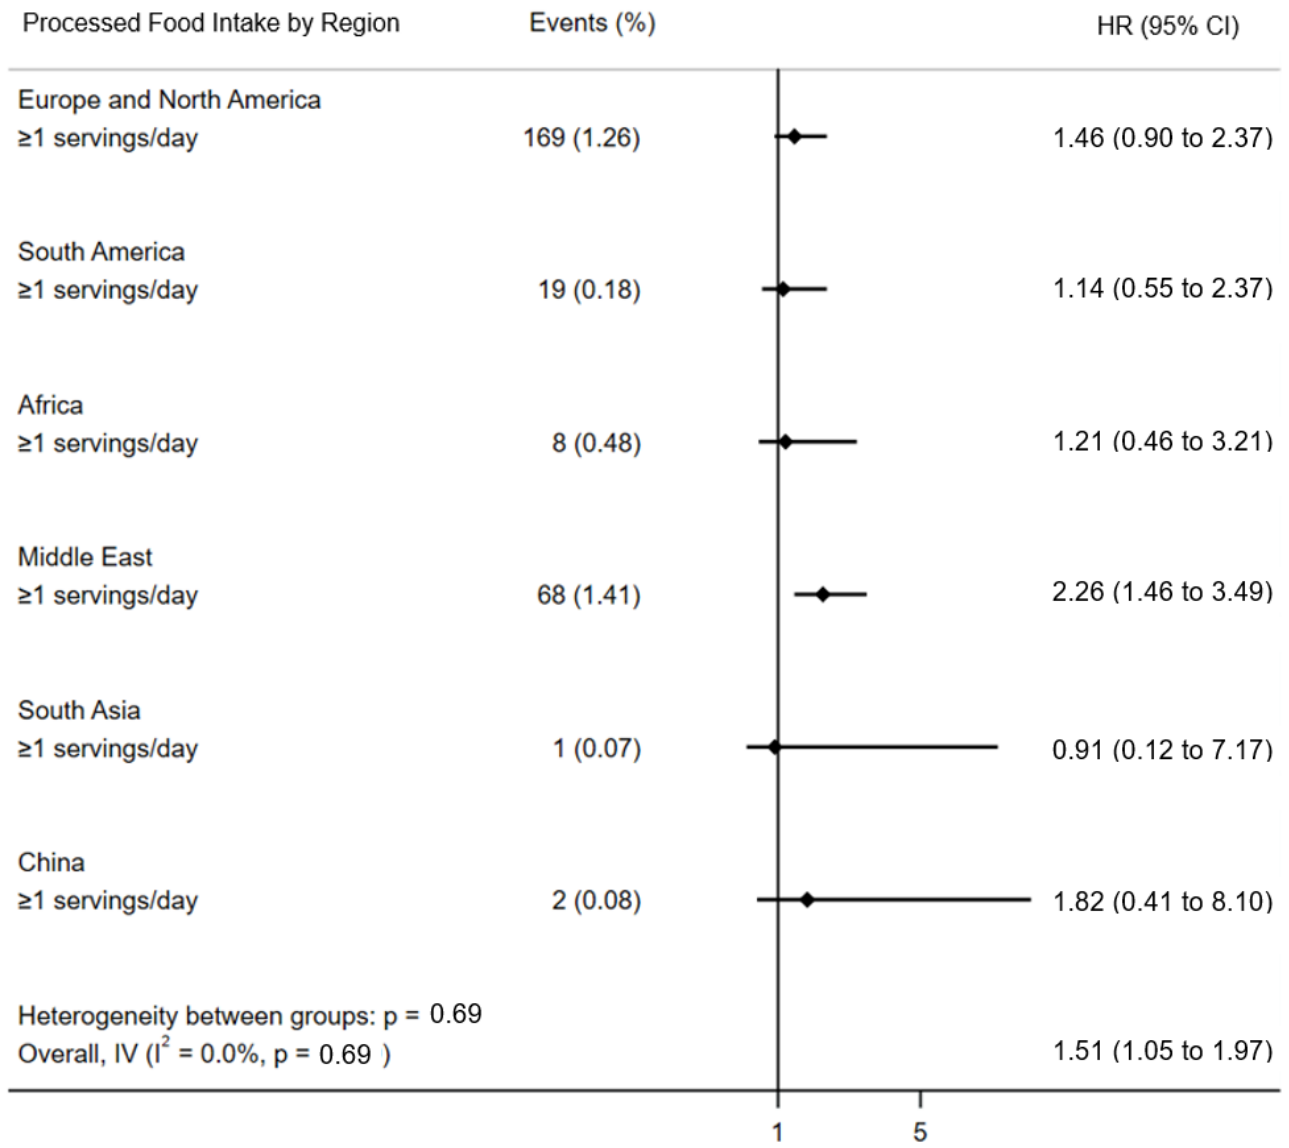

Supplement: narn063175.ww.pdf [file narn063175.ww.pdf]
